# Supplementary material for: Intratumor heterogeneity of lymphoma identified by multiregion sequencing of autopsy samples
Source: PubMed Central journal article supplement (PMC8748235; doi:10.1111/cas.15178), 2021-11-21
Supplement: CAS-113-362-s001.pdf [file CAS-113-362-s001.pdf]

Table S2. Total copy number at mutant loci inferred from whole exome sequencing.

| Gene     | Cytoband | Total copy number |     |     |     |      |      |     |     |     |     |   |           |           |
|----------|----------|-------------------|-----|-----|-----|------|------|-----|-----|-----|-----|---|-----------|-----------|
|          |          | tumor2019         |     |     |     |      |      |     |     |     |     |   | tumor2006 | tumor2007 |
|          |          | kid               | ll1 | ll2 | ll3 | lym1 | lym2 | r11 | r12 | r13 | spl |   |           |           |
| ANGPTL4  | 19p13.2  | 1                 | 1   | 1   | 0   | 0    | 0    | 0   | 1   | 1   | 0   | 1 | 1         |           |
| FTSJ1    | Xp11.23  | 3                 | 2   | 2   | 3   | 3    | 3    | 3   | 2   | 3   | 2   | 2 | 1         |           |
| HIST1H1B | 6p22.1   | 2                 | 2   | 2   | 2   | 2    | 2    | 3   | 3   | 3   | 3   | 2 | 1         |           |
| TEX10    | 9q31.1   | 2                 | 2   | 3   | 3   | 4    | 3    | 3   | 3   | 3   | 3   | 2 | 2         |           |
| ILI0RA   | 11q23.3  | 1                 | 2   | 1   | 1   | 1    | 0    | 1   | 1   | 1   | 1   | 2 | 2         |           |
| B2M      | 15q21.1  | 2                 | 3   | 2   | 3   | 3    | 2    | 3   | 3   | 3   | 3   | 2 | 2         |           |
| ARHGAP35 | 19q13.32 | 1                 | 1   | 1   | 1   | 1    | 0    | 1   | 1   | 1   | 1   | 1 | 4         |           |
| ATF7IP   | 12p13.1  | 3                 | 2   | 3   | 3   | 3    | 3    | 2   | 2   | 3   | 2   | 2 | 2         |           |
| CASR     | 3q21.1   | 3                 | 2   | 3   | 3   | 3    | 3    | 3   | 3   | 3   | 3   | 3 | 2         |           |
| CDX4     | Xq13.2   | 3                 | 2   | 2   | 3   | 3    | 3    | 3   | 2   | 3   | 2   | 4 | 1         |           |
| CNDP1    | 18q22.3  | 1                 | 1   | 4   | 4   | 2    | 2    | 4   | 1   | 1   | 3   | 2 | 4         |           |
| CWF19L2  | 11q22.3  | 1                 | 2   | 1   | 1   | 1    | 1    | 1   | 2   | 1   | 1   | 2 | 2         |           |
| DYSF     | 2p13.2   | 1                 | 2   | 2   | 2   | 1    | 2    | 2   | 1   | 2   | 2   | 3 | 2         |           |
| FAT2     | 5q33.1   | 1                 | 2   | 1   | 2   | 1    | 1    | 2   | 2   | 2   | 2   | 2 | 2         |           |
| FAT3     | 11q14.3  | 1                 | 2   | 1   | 1   | 1    | 1    | 1   | 2   | 1   | 1   | 2 | 2         |           |
| GRK7     | 3q23     | 3                 | 2   | 3   | 3   | 3    | 3    | 3   | 3   | 3   | 3   | 3 | 2         |           |
| HNF1B    | 17q12    | 1                 | 1   | 1   | 2   | 1    | 1    | 1   | 1   | 2   | 1   | 1 | 1         |           |
| LRRIQ1   | 12q21.31 | 2                 | 2   | 2   | 3   | 3    | 3    | 2   | 2   | 2   | 2   | 2 | 2         |           |
| MYH2     | 17p13.1  | 3                 | 3   | 2   | 3   | 3    | 3    | 3   | 2   | 3   | 3   | 1 | 1         |           |
| OR4D9    | 11q12.1  | 1                 | 1   | 1   | 1   | 1    | 1    | 1   | 1   | 1   | 1   | 2 | 1         |           |
| OTOA     | 16p12.2  | 1                 | 1   | 1   | 1   | 1    | 0    | 1   | 1   | 1   | 1   | 1 | 1         |           |
| PKD1L1   | 7p12.3   | 2                 | 2   | 2   | 2   | 2    | 2    | 2   | 2   | 2   | 2   | 3 | 2         |           |
| PKD2L1   | 10q24.31 | 2                 | 2   | 2   | 2   | 1    | 2    | 2   | 2   | 2   | 2   | 3 | 2         |           |
| PLXNC1   | 12q22    | 2                 | 2   | 2   | 3   | 3    | 3    | 2   | 2   | 2   | 2   | 2 | 2         |           |
| RNASE6   | 14q11.2  | 2                 | 2   | 2   | 1   | 1    | 0    | 2   | 1   | 2   | 1   | 1 | 2         |           |
| RTL1     | 14q32.2  | 2                 | 2   | 2   | 2   | 2    | 2    | 2   | 2   | 2   | 2   | 2 | 2         |           |
| SLC8A1   | 2p22.1   | 2                 | 2   | 2   | 2   | 2    | 2    | 2   | 2   | 2   | 2   | 3 | 2         |           |
| TMTC1    | 12p11.22 | 3                 | 2   | 3   | 3   | 3    | 3    | 2   | 2   | 3   | 2   | 2 | 2         |           |
| TNMD     | Xq22.1   | 3                 | 2   | 2   | 3   | 3    | 3    | 3   | 2   | 3   | 2   | 4 | 1         |           |
| VWDE     | 7p21.3   | 2                 | 2   | 2   | 2   | 2    | 2    | 2   | 2   | 2   | 2   | 2 | 2         |           |
| WFDC12   | 20q13.12 | 2                 | 2   | 2   | 2   | 3    | 3    | 2   | 2   | 2   | 2   | 2 | 1         |           |
| CSRNP1   | 3p22.2   | 3                 | 2   | 3   | 3   | 3    | 3    | 3   | 3   | 3   | 3   | 2 | 2         |           |
| CUL9     | 6p21.1   | 2                 | 2   | 3   | 2   | 2    | 2    | 3   | 3   | 3   | 3   | 2 | 1         |           |
| RAD51B   | 14q24.1  | 2                 | 2   | 2   | 2   | 2    | 2    | 2   | 2   | 2   | 2   | 2 | 2         |           |
| TP53     | 17p13.1  | 1                 | 1   | 1   | 1   | 0    | 0    | 1   | 1   | 1   | 0   | 1 | 1         |           |
| USP28    | 11q23.2  | 1                 | 2   | 1   | 1   | 1    | 0    | 1   | 2   | 1   | 1   | 2 | 2         |           |
| ZMYND8   | 20q13.12 | 2                 | 2   | 2   | 2   | 3    | 3    | 2   | 2   | 2   | 2   | 2 | 1         |           |

kid, kidney; spl, spleen; lym1, lymph node 1; lym2, lymph node 2; r11, right lung 1; r12, right lung 2; r13, right lung 3; ll1: left lung 1; ll2, left lung 2; ll3, left lung 3.
